# Supplementary material for: Effect of supercritical carbon dioxide on molecular aggregation states of side chains of semicrystalline poly{2-(perfluorooctyl)ethyl acrylate} brush thin films
Source: Royal Society of Chemistry journal article supplement (doi:10.1039/c3ra22692a), 2013-01-01
Supplement: c3ra22692a.pdf [file c3ra22692a.pdf]

Supplemental Information

**Effect of Supercritical Carbon Dioxide on Molecular Aggregation States of Side Chains of Semicrystalline Poly{2-(perfluorooctyl)ethyl acrylate} Brush Thin Films**

Hiroki Yamaguchi, Peter Gin, Motoyasu Kobayashi, Steve Bennett, Sushil K. Satija, Mitsunori Asada, Tadanori Koga\*, and Atsushi Takahara\*

1. AFM images of the poly(FA-C<sub>8</sub>) brush thin film before and the after the scCO<sub>2</sub> treatment

By using AFM, we characterized the surface structures of the poly(FA-C<sub>8</sub>) brush films before and after the scCO<sub>2</sub> treatment at the conditions of  $T = 309\text{K}$  and  $P = 8.2\text{ MPa}$  for 1 h and subsequent quench at a rate of 50 MPa/min. It was found that the CO<sub>2</sub> treated films have more distinct surface structures and larger surface roughness relative to the untreated films. ...

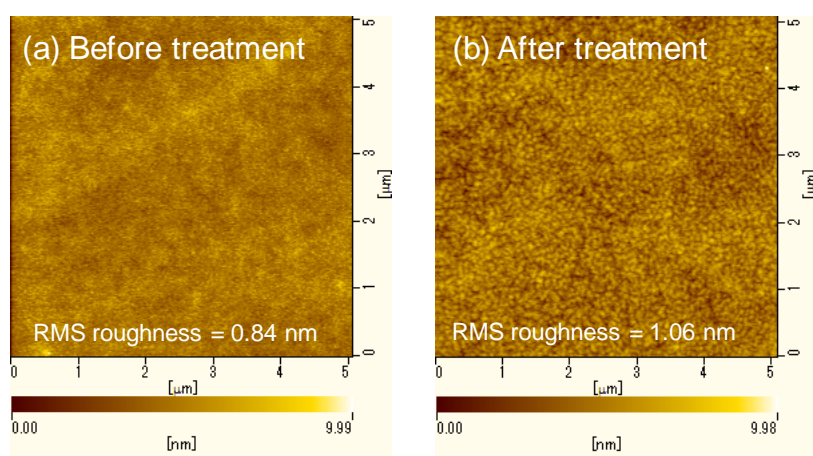

Fig. S1. Atomic force microscopy (AFM) images (topographic images) of the poly(FA-C<sub>8</sub>) brush before and after the treatment with scCO<sub>2</sub> and subsequent slow quench process. AFM observations were conducted in tapping mode at a driving frequency of 110 kHz using an SPA-400 with an SPI 3800N controller (SII NanoTechnology Inc.) in air at room temperature (relative humidity 30%). The polymer brush surface was scanned at a rate of 10 μm/s using an aluminum-coated silicon nitride rectangular cantilever (SI-DF20, SII NanoTechnology Inc.) with a spring constant of 15 N/m.
